# Supplementary material for: Recruitment of Arabidopsis RNA Helicase AtRH9 to the Viral Replication Complex by Viral Replicase to Promote Turnip Mosaic Virus Replication
Source: PubMed Central journal article supplement (PMC4960543; doi:10.1038/srep30297), 2016-07-26
Supplement: srep30297-s1.pdf [file srep30297-s1.pdf]

## **Supplementary information**

### **Recruitment of Arabidopsis RNA Helicase AtRH9 to the Viral Replication Complex by Viral Replicase to Promote Turnip Mosaic Virus Replication**

Yinzi Li<sup>1,2</sup>, Ruyi Xiong<sup>1,2</sup>, Mark Bernards<sup>2</sup> & Aiming Wang<sup>1,2</sup> \*

<sup>1</sup>London Research and Development Centre, Agriculture and Agri-Food Canada, London, Ontario, N5V 4T3, Canada

<sup>2</sup>Department of Biology, Western University, London, Ontario, N6A 5B7, Canada

\*For correspondence: [Aiming.Wang@AGR.GC.CA](mailto:Aiming.Wang@AGR.GC.CA)

#### **Content**

**Table S1. Primers Used for PCR-Screening of Homozygous *Arabidopsis atrh* T-DNA Insertion Lines.**

**Figure S1. Genotyping and RT-PCR Analysis of *Arabidopsis atrh9* T-DNA Insertion Lines.**

**Figure S2. Knockdown of *AtRH9* Expression Affects TuMV Infection in *Arabidopsis*.**

**Figure S3. Negative Controls for BiFC Assay.**

**Figure S4. Sequence Alignment of eIF4A and AtRH9 using the CLUSTAL W Program.**

**Table S1 Primers Used for PCR-Screening of Homozygous *Arabidopsis atrh* T-DNA Insertion Lines.**

| <b>Primer Name</b> | <b>Primer sequence (5'-3')</b> |
|--------------------|--------------------------------|
| SALK_049805-LP     | TTACCCATATTGCCACTGGTC          |
| SALK_049805-RP     | TTTATGGAACCCTGTCAGTGC          |
| CS839540-LP        | AAACGCTGTTGTGTTGCCTAG          |
| CS839540-RP        | AAGTGACTGCACGTTACCAGG          |
| SALK_063362-LP     | CAGGTTTGAGGGGTTCCCTAAG         |
| SALK_063362-RP     | AGGGAATCTCAAAAGCTCGAG          |
| SALK_073018C-LP    | ATATCGTGGTTGCAACTCCTG          |
| SALK_073018C-RP    | TACCTCTGCCACCATAACCAG          |
| SALK_001503-LP     | ATCTGTCCACTTTGGTTGTCG          |
| SALK_001503-RP     | GCTTGAATTTTGAAGGGTTC           |
| SALK_122885-LP     | CAAGCGAAGCAAGCAAATTAG          |
| SALK_122885-RP     | TTGACTAAAACACCCTTTAGTTTTC      |
| SALK_138586-LP     | CAAGCGAAGCAAGCAAATTAG          |
| SALK_138586-RP     | AACACCCTTTAGTTTCTTATAAAAGTG    |
| SALK_024905-LP     | CTGCTGAACCACCTCATTAGC          |
| SALK_024905-RP     | ACCAAGGGATTAGGTGCAAAG          |
| SALK_148563-LP     | CTAGGGAGAGATCTCCACAGG          |
| SALK_148563-RP     | TCGAGGAATTGACATTCAAGC          |
| CS852120-LP        | ACCTCAACAAGGCATACATCG          |
| CS852120-RP        | ACGAGAATCAAGCCCTAGCTC          |
| SALK_083512-LP     | TTTCAGGTTTCATTCATGAGGC         |
| SALK_083512-RP     | TTACTAGCATGTGCAAGCGTG          |
| SALK_124308C-LP    | TGAAGGGACGTGATCTTATCG          |
| SALK_124308C-RP    | TTTCGATTCACCACAAATTCC          |
| SALK_114853C-LP    | TCAATCGGAGAACTGATTTCG          |
| SALK_114853C-RP    | GATGCCTCTTGCTGTATCTGC          |
| SALK_100059-LP     | CTGAGCTTCATGAGGGTTTTG          |
| SALK_100059-RP     | TGTCGAAGATAATCGGTTTTCG         |
| CS839970-LP        | TCTCGCCCTCTATCTCTCTCC          |
| CS839970-RP        | GGATGCGTCGTATCTATGAGC          |
| SALK_032399-LP     | CAAGATGCTGTTTGGGTTAGC          |
| SALK_032399-RP     | ATTCATCAGATGGCTGATTGC          |
| SALK_065388-LP     | AGGGTTGGAGAAGAATTTTGC          |
| SALK_065388-RP     | CGGATTTTGCTAGTTCTGCAG          |
| SALK_087182-LP     | CCAGAACTCACAGATCTTGCC          |

|                |                        |
|----------------|------------------------|
| SALK_087182-RP | AGCTAAAAACGAGCAAGGAGG  |
| SALK_045730-LP | AATATCTTCATTGGCCATCCC  |
| SALK_045730-RP | GTTACCTCAAGGCCAAGAAGG  |
| SALK_106823-LP | TGCGTATGCCTATAGGACCTG  |
| SALK_106823-RP | TGGTGTCCCTGTCTACGTTTC  |
| CS832362-LP    | CAAGAAAACGAGAGAGCAAGC  |
| CS832362-RP    | CAGAATTCATGGAAGCGAGAC  |
| SALK_012018-LP | TGTTTGTGAGTTTCAGCATCG  |
| SALK_012018-RP | TATACATGATTGGTCCCACCC  |
| SALK_082807-LP | AAATGTCCTTCTTCTCGTGGG  |
| SALK_082807-RP | TCATCAATTCAGGGATGAGC   |
| CS848715-LP    | CGAGGAAAGTATTGCGATGAG  |
| CS848715-RP    | TTGCATTGGATAGGCTTGAAC  |
| SALK_090068-LP | TCACACCCTTTAACCTCGTTG  |
| SALK_090068-RP | ATGGGAGATATTGGGGATTG   |
| SALK_017083-LP | CTGGCATGGCTCAGATTCTAG  |
| SALK_017083-RP | TGGGTAAACATCGTGTTTTGG  |
| SALK_119034-LP | GAACCAGTCATCTCATGGACG  |
| SALK_119034-RP | CGATAAACCTCGAAAGAACC   |
| SALK_099097-LP | CGGATATCAATAGCAAGCAGC  |
| SALK_099097-RP | TTGCTTTCCGACTTCTCACAC  |
| SALK_056041-LP | GTTACAAGAAGATCGCTTGC   |
| SALK_056041-RP | GCCTCATTTTGTACATCTCC   |
| SALK_020125-LP | ATTCCAAAGATGCAACAGGTG  |
| SALK_020125-RP | GTCTGAGGGATGCTCAGAGTG  |
| CS843411-LP    | GGAAAGGGACTGCCATTTAAG  |
| CS843411-RP    | TCAAAGGTTGGTCCAATGTTC  |
| SALK_068359-LP | TGAGTAATGGACTTGTTCCGCC |
| SALK_068359-RP | TTGCAAATACTGGAGGGTTTG  |
| SALK_056387-LP | TGATGTGATAGACGAGGGAGG  |
| SALK_056387-RP | TAGGTACATCAAGTCCACGGG  |
| SALK_019721-LP | ACCATTATTGCTGCCTTTTCC  |
| SALK_019721-RP | ATAGCCTGTCTTTGGATTGGG  |
| SALK_143440-LP | ATAGCCTGTCTTTGGATTGGG  |
| SALK_143440-RP | TGTTTCTTCTCTTTGGCGTTC  |
| SALK_040389-LP | CTACAGGTCTGGTCCAGATGG  |
| SALK_040389-RP | TTAAGCTTCTCCCTCAAAGGC  |
| SALK_068401-LP | TTCTAATGTCCTTGCCATTGG  |

|                 |                                     |
|-----------------|-------------------------------------|
| SALK_068401-RP  | TTAAGCTTCTCCCTCAAAGGC               |
| SALK_062509C-LP | TGTCCTCCCGATTCTGTGTAC               |
| SALK_062509C-RP | ATATGGGTTTCGAGGAACCTG               |
| SALK_028850-LP  | TGGCAATCCAGAATGAGTAGG               |
| SALK_028850-RP  | AGCTATCTCCGAAAGAAACGC               |
| LB1             | GCCTTTTCAGAAATGGATAAATAGCCTTGCTTCC  |
| LB2             | GCTTCCTATTATATCTTCCCAAATTACCAATACA  |
| LB3             | TAGCATCTGAATTTTCATAACCAATCTCGATACAC |
| LBb1.3          | ATTTTGCCGATTTTCGGAAC                |

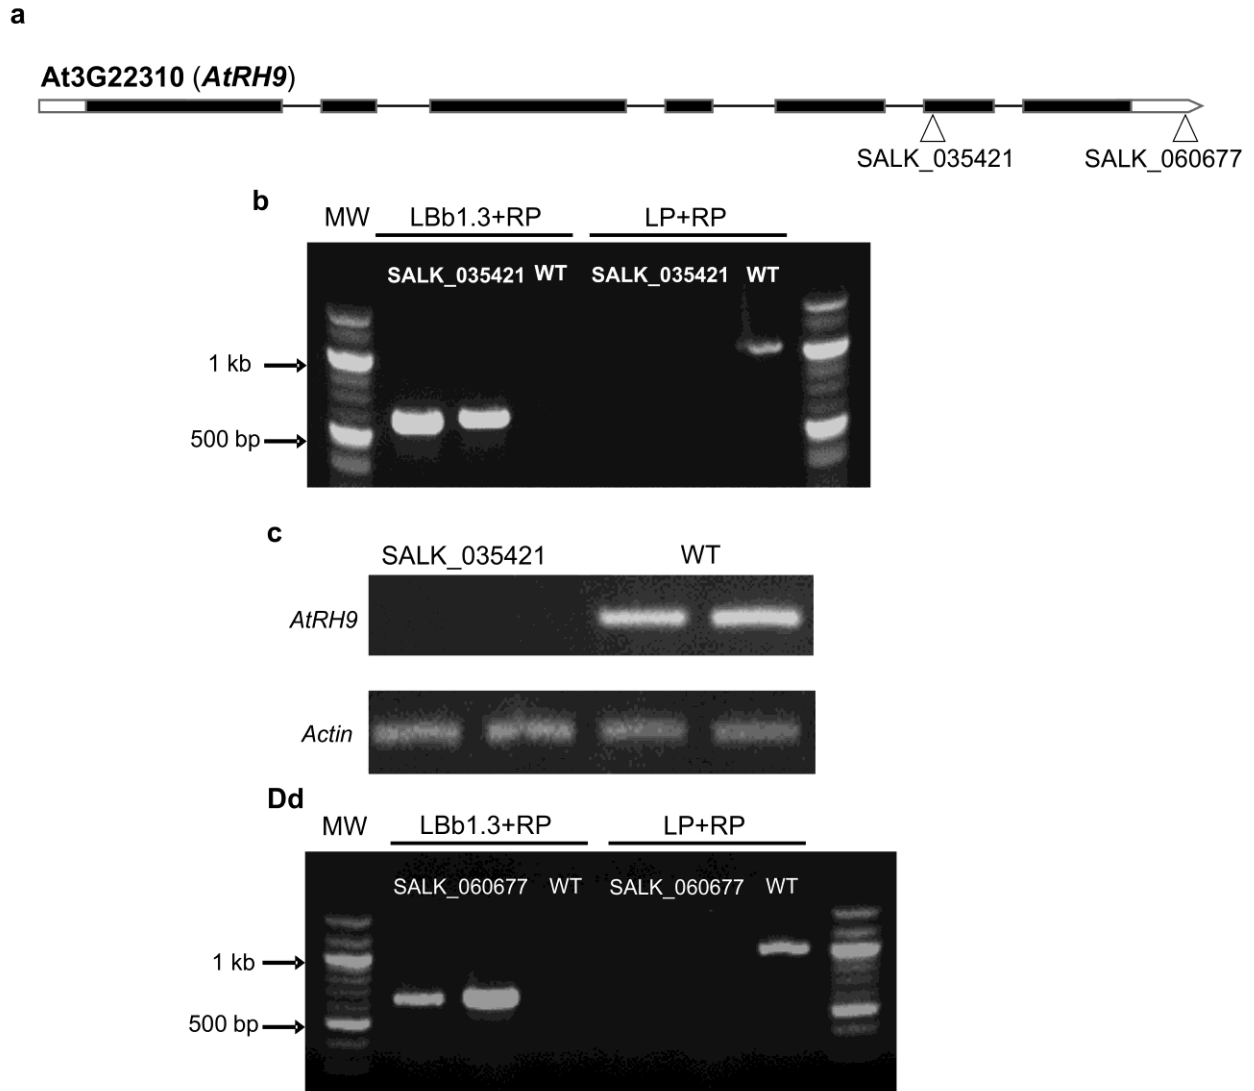

**Figure S1. Genotyping and RT-PCR Analysis of *Arabidopsis atrh9* T-DNA Insertion Lines.**

**a**, Schematic characterization of *AtRH9* and T-DNA insertion sites (triangles) in *Arabidopsis* T-DNA insertion mutants. Exons and introns are indicated by boxes and lines respectively. 5' and 3' untranslated regions are shown as open boxes.

**b**, Screening for homozygous *atrh9* T-DNA insertion lines. PCR was conducted using genomic DNA from *atrh9* (SALK\_035421) and WT plants. Two gene-specific primers (LP+RP) were used to detect wild-type genotype. A T-DNA specific primer and a gene-specific primer (LB+RP) were used to amplify a single PCR fragment which represented the pattern of homozygous genotype. WT, wild-type *Arabidopsis*; LP, left genomic primer; RP, right genomic primer; LB, left border primer of the T-DNA insertion.

**c**, RT-PCR analysis of *AtRH9* expression in *atrh9* mutants and WT plants (SALK\_035421). RT-PCR was performed using cDNA derived from leaf tissues of *Arabidopsis atrh9* mutants and WT plants with *AtRH9* specific primers. *Actin2* (*Actin*) gene was used as an internal control.

**d**, Screening for homozygous *atrh9-1* T-DNA insertion line, SALK\_060677. A single PCR product was amplified using genomic DNA from the mutant using a T-DNA specific primer and a gene-specific primer (LB+RP).

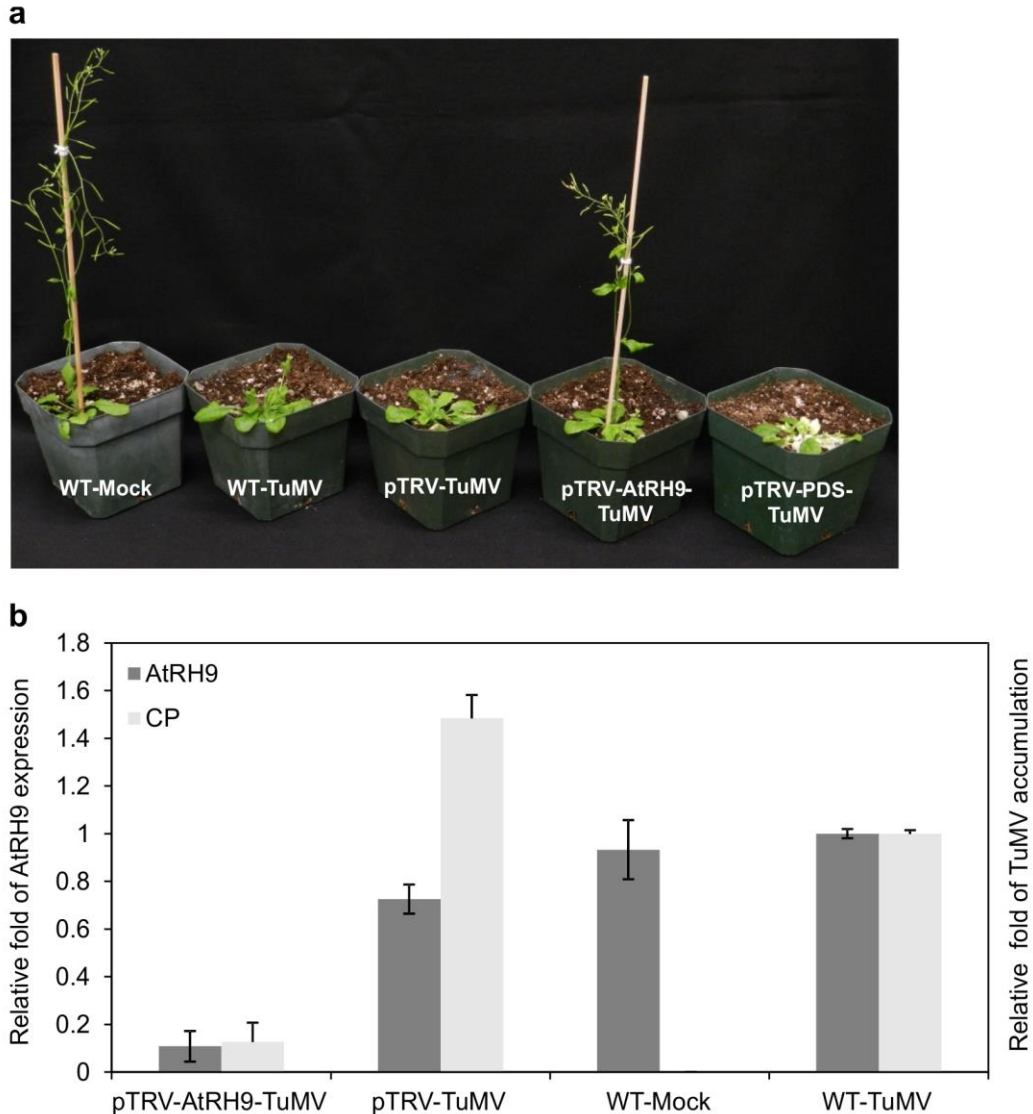

**Figure S2. Knockdown of *AtRH9* Expression Affects TuMV Infection in *Arabidopsis*.**

**a**, Phenotypes of TuMV-infected *AtRH9*-knockdown plants, empty VIGS vector-infiltrated plants and *Arabidopsis* WT plants. pTRV-PDS-TuMV, wild-type *Arabidopsis* plants infiltrated with TRV-based VIGS vectors targeting *phytoene desaturase* (*PDS*) to silence and then inoculated with TuMV; pTRV-*AtRH9*-TuMV, WT infiltrated with TRV-based VIGS vectors targeting *AtRH9* followed by inoculation with TuMV; pTRV-TuMV, WT infiltrated with empty TRV-based VIGS vectors and then inoculated with TuMV; WT-Mock, WT infiltrated with buffer and then inoculated with buffer; WT-TuMV, WT inoculated with TuMV. Images were taken 15 days post inoculation (dpi). TuMV, inoculated with TuMV. Mock, inoculated with buffer.

**b**, Relative fold changes in TuMV accumulation and expression level of *AtRH9* in *AtRH9*-silenced *Arabidopsis* plants and WT plants. RNA was extracted from leaf tissues for real-time RT-PCR analysis at 15 dpi. Three independent experiments, each consisting of three biological replicates were carried out for quantification analysis. Target genes were normalized against *Actin2* transcripts in each sample. The values are presented as means of fold change relative to the WT plants. Error bars represent standard deviations.

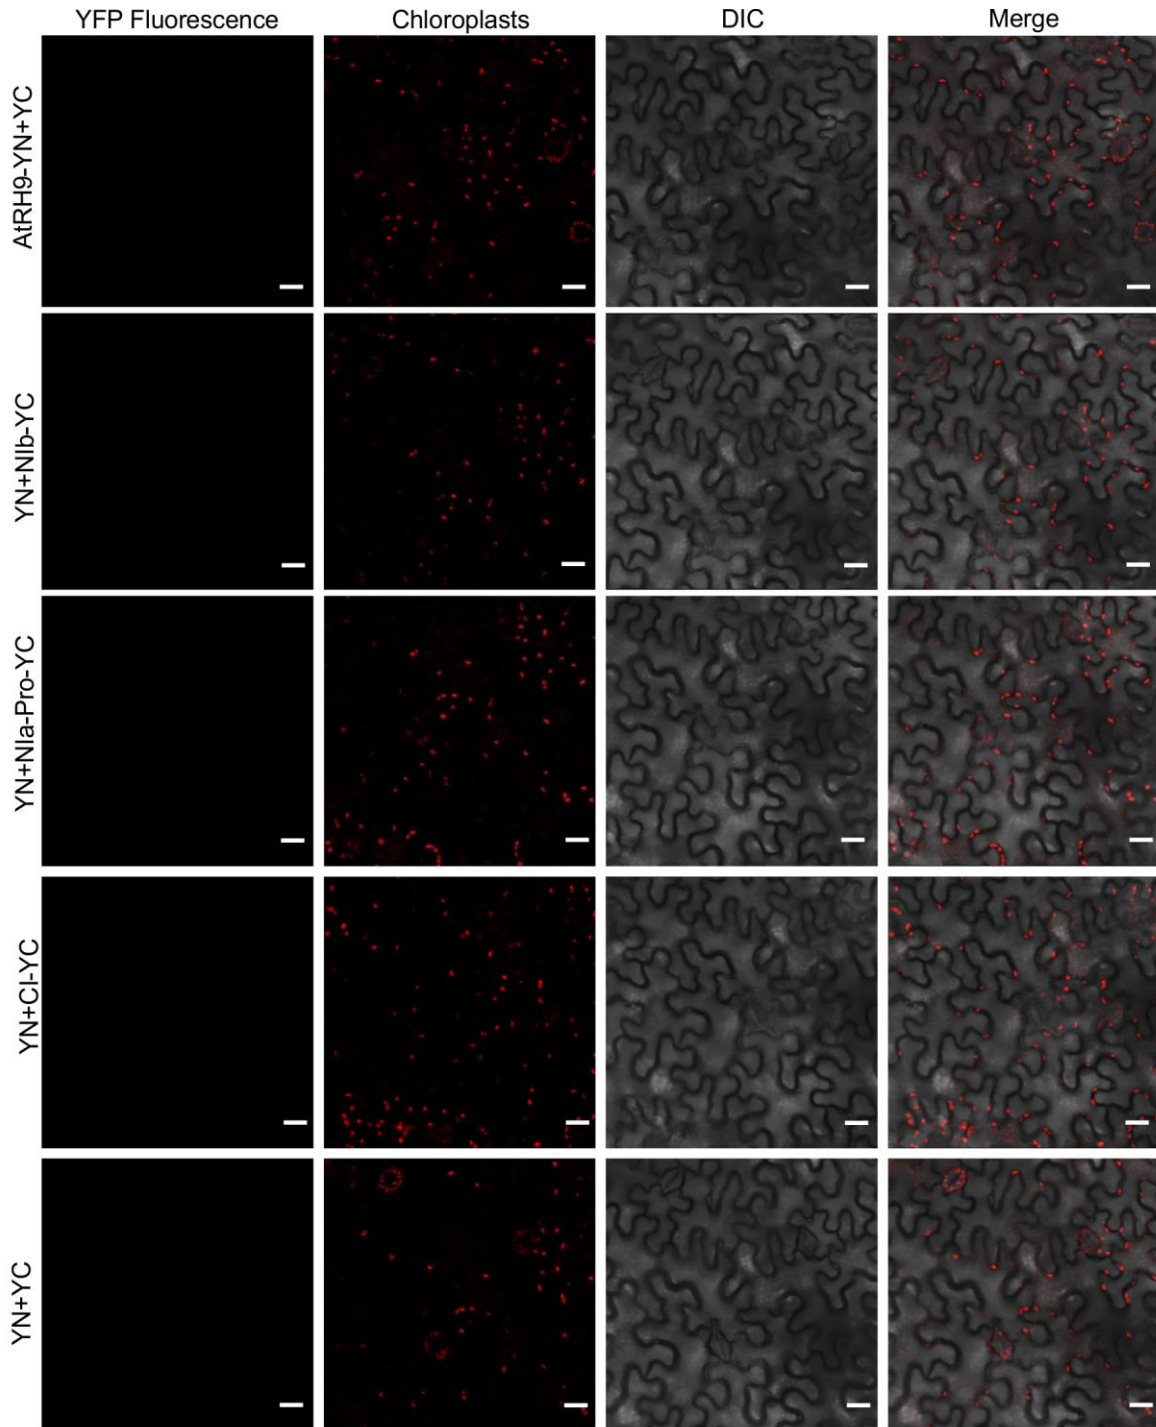

**Figure S3. Negative Controls for BiFC Assay.**

*N. benthamiana* leaves were co-agroinfiltrated with constructs expressing AtRH9-YN and YC, YN and Nib-YC, YN and Nla-Pro-YC, YN and CI-YC or YN and YC serving as negative controls. The reconstructed YFP fluorescence was recorded 48 hours post agroinfiltration using a confocal microscopy. No YFP fluorescence signal was observed in all the negative controls displayed. DIC, differential interference contrast. Bars, 20  $\mu$ m.

|       |                                                              |                                                                     |
|-------|--------------------------------------------------------------|---------------------------------------------------------------------|
| eIF4A | -----VHESFDAMGLQENLLRGIYAYGFEKPSA                            | <b>Motif Q</b>                                                      |
| AtRH9 | -----DGGIGDSESVGSSGGDGLAIADLGISPEIVKALKGRGIEKLF              |                                                                     |
|       |                                                              | <b>Motif I</b>                                                      |
| eIF4A | IQQRGIVPFCKGLDVIQQAQSGTGKTATFCSGVLQQLD-FS-----LIQC--QALVLAPT |                                                                     |
| AtRH9 | IQKAVLEPAMEGRDMIGRARTGTGKTIAFGIPIIDKIIKFNAKHGRGKNP--QCLVLAPT |                                                                     |
|       |                                                              | <b>Motif Ia</b> <span style="float: right;"><b>Motif Ib</b></span>  |
| eIF4A | RELAQQIEKVMRALG---DYLGVKVHACVGGTSVREDQRILQ-AGVHVVVGTPGRVFDML |                                                                     |
| AtRH9 | RELARQVEKEFRESA---PSLD--TICLYGGTPIGQQMRELN-YGIDVAVGTPGRIIDL  |                                                                     |
|       |                                                              | <b>Motif II</b> <span style="float: right;"><b>Motif III</b></span> |
| eIF4A | KRQ---SLRADNIKMFVLDEADEMLSRGFKDQIYDIFQLLPPKIQVGVFSATMPPEALEI |                                                                     |
| AtRH9 | KRG---ALNLSEVQFVVLDEADQMLQVGFADVEIILQKLPKRQSMFSAITMPSWIRSL   |                                                                     |
| eIF4A | TRKFMSKPVRI-LVKRD--ELTLEGI-KQFYVNVEKEEWKLETL-CDLY-ETLA---ITQ |                                                                     |
| AtRH9 | TKKYLNNPLTI-DLVGSDQKLADGI-TMYSIAAD--SYGRASIIIGPLVKEHGK---GGK |                                                                     |
|       |                                                              | <b>Motif IV</b>                                                     |
| eIF4A | SVIFVNTRRKVDWLTDKMRSDHTVSATHGDMQNTTRDIIMREFRSGSSRVLITTDLLAR  |                                                                     |
| AtRH9 | CIVFTQTKRDADRLAFLGL-AKSYKCEALHGDISQAQRERTLAGFRDGNFSLVATDVAAR |                                                                     |
|       |                                                              | <b>Motif V</b> <span style="float: right;"><b>Motif VI</b></span>   |
| eIF4A | GIDVQQVSLVINFDLPTQPENYIHRIGRSGRFGRKGVAINFVTRDDERMLC-LRTWPICC |                                                                     |
| AtRH9 | GLDVPNVDLVIHYELPNNTETFVHRTGRTGRAGKKSAILIHGQDQTRAVK-MIEKEVGS  |                                                                     |

**Figure S4. Sequence Alignment of eIF4A and AtRH9 using the CLUSTAL W Program.**

All the conserved motifs (Q, I, Ia, Ib, II, III, IV, V, VI) of DEAD-box RNA helicase were shown in boxes. The accession numbers of the aligned protein sequences are eIF4A (At3g13920) and AtRH9 (At3g22310).
